# Supplementary material for: Performance evaluation of the inverse real-valued fast Fourier transform on field programmable gate array platforms using open computing language
Source: PeerJ journal article supplement (doi:10.7717/peerj-cs.3313), 2025-11-03
Supplement: rawdata.xlsx [file rawdata.xlsx]

## Sheet: Sheet1
1.39	0.054	0.7
2.05	0.097	0.32
RFFT
Resource	Usage
Logic utilization	0.45
Dedicated logic registers	0.2
Memory Block	0.32
DSP Block	0.31
CFFT
Resource	Usage
Logic utilization	0.57
Dedicated logic registers	0.25
Memory Block	0.34
DSP Block	0.47
FPGA Real	FPGA Complex	FFTW Real	FFTW Complex	CUFFT Real	CUFFT Complex
0.321608	0.235641	0.147126	0.065373	0.453579	0.53024
0.64	0.460763	0.115419	0.046818	0.620757	0.693767
1.1179	0.811153	0.092286	0.044146	0.739884	0.745052
1.37634	0.929388	0.06878	0.03256	0.778352	0.77062
1.5586	1.08994	0.070704	0.031978	0.796825	0.79214
1.50699	1.25907	0.068672	0.036771	0.808719	0.799375
1.90867	1.20382	0.0677	0.045959	0.812118	0.81493
2.04646	1.38753	0.096881	0.053976	0.820776	0.824601
5
6
7
8
9
10
11
12
FPGA Real	4.0201	9.6	19.5633	27.5269	35.0685	37.6748	52.4884	61.394
FPGA Complex	5.891	13.8229	28.3904	37.1755	49.0474	62.9534	66.2101	83.252
FFTW Real	1.8391	1.7312	1.615	1.3756	1.5908	1.7168	1.8618	2.9064
FFTW Complex	1.6343	1.4045	1.5451	1.3024	1.439	1.8386	2.5277	3.2385
CUFFT Real	5.6697	9.3113	12.9479	15.567	17.9286	20.2179	22.3333	24.6232
CUFFT Complex	13.256	20.813	26.0768	30.8248	35.6463	39.9688	44.8211	49.4761
FPGA Real	0.191433	0.457143	0.931586	1.3108	1.66993	1.79404	2.49945	2.92352
FPGA Complex	0.280524	0.658233	1.35192	1.77026	2.33559	2.99778	3.15286	3.96438
FFTW Real	0.114944	0.1082	0.100937	0.085975	0.099425	0.1073	0.116362	0.18165
FFTW Complex	0.102144	0.0877813	0.0965687	0.0814	0.0899375	0.114913	0.157981	0.202406
CUFFT Real	0.218065	0.358127	0.497996	0.598731	0.689562	0.777612	0.858973	0.947046
CUFFT Complex	0.509846	0.8005	1.00295	1.18557	1.37101	1.53726	1.72389	1.90293
FPGA Real	FPGA Complex	FFTW Real	FFTW Complex	CUFFT Real	CUFFT Complex
0.3153	0.235641	0.126	0.065373	0.381	0.53024
0.5818	0.460763	0.1473	0.046818	0.5541	0.693767
0.931	0.811153	0.0927	0.044146	0.6827	0.745052
1.3801	0.929388	0.0772	0.03256	0.7431	0.77062
1.4971	1.08994	0.0643	0.031978	0.7752	0.79214
1.5261	1.25907	0.068	0.036771	0.7984	0.799375
1.9221	1.20382	0.0743	0.045959	0.8053	0.81493
2.0111	1.38753	0.0775	0.053976	0.8171	0.824601
FPGA Real	3.9409	8.7272	16.291	27.6011	33.6842	38.152	52.8578	57.8123
FPGA Complex	5.891	13.8229	28.3904	37.1755	49.0474	62.9534	66.2101	83.252
FFTW Real	1.5748	2.2094	1.6214	1.544	1.4462	1.7009	2.043	2.3236
FFTW Complex	1.6343	1.4045	1.5451	1.3024	1.439	1.8386	2.5277	3.2385
CUFFT Real	4.762	8.3112	11.9467	14.8621	17.4413	19.961	22.1471	24.5122
CUFFT Complex	13.256	20.813	26.0768	30.8248	35.6463	39.9688	44.8211	49.4761
FPGA Real	FPGA Complex	FFTW Real	FFTW Complex	CUFFT Real	CUFFT Complex
15.3147	11.221	9.19538	4.08581	17.4453	20.3938
30.4762	21.9411	7.21369	2.92612	23.8753	26.6833
53.2335	38.6263	5.76788	2.75913	28.4571	28.6558
65.5402	44.2566	4.29875	2.035	29.9366	29.6392
74.219	51.902	4.419	1.99863	30.6471	30.4669
71.7614	59.9556	4.292	2.29819	31.1046	30.7452
90.8889	57.3248	4.23125	2.87244	31.2353	31.3435
97.4507	66.073	6.05506	3.3735	31.5683	31.7154
FPGA Real	FPGA Complex	FFTW Real	FFTW Complex	CUFFT Real	CUFFT Complex
15.0143	11.221	7.875	4.08581	14.6538	20.3938
27.7048	21.9411	9.20625	2.92612	21.3115	26.6833
44.3333	38.6263	5.79375	2.75913	26.2577	28.6558
65.719	44.2566	4.825	2.035	28.5808	29.6392
71.2905	51.902	4.01875	1.99863	29.8154	30.4669
72.6714	59.9556	4.25	2.29819	30.7077	30.7452
91.5286	57.3248	4.64375	2.87244	30.9731	31.3435
95.7667	66.073	4.84375	3.3735	31.4269	31.7154
FPGA Real		CPU Real		GPU Real
0.321608		0.0576		0.0058
0.64		0.0416		0.0057
1.1179		0.0479		0.0055
1.37634		0.0317		0.0058
1.5586		0.0139		0.006
1.50699		0.0131		0.0063
1.90867		0.0076		0.0064
2.04646		0.0043		0.0068
FPGA Real		CPU Real		GPU Real
4.0201		0.7201		0.7201
9.6		0.6242		0.6242
19.5633		0.8374		0.8374
27.5269		0.633		0.6301
35.0685		0.3128		0.3128
37.6748		0.3257		0.3257
52.4884		0.2104		0.1737
61.394		0.1277		0.2034
FPGA Real		CPU Real		GPU Real
15.3147		3.6		0.223077
30.4762		2.6		0.219231
53.2335		2.99375		0.211538
65.5402		1.98125		0.223077
74.219		0.86875		0.230769
71.7614		0.81875		0.242308
90.8889		0.475		0.246154
97.4507		0.26875		0.261538
FPGA Real		CPU Real		GPU Real
0.3153		0.0557		0.0005
0.5818		0.03854		0.0015
0.931		0.02759		0.0016
1.3801		0.02912		0.0016
1.4971		0.01317		0.0017
1.5261		0.01273		0.0018
1.9221		0.0052		0.002
2.0111		0.0029		0.002
FPGA Real		CPU Real		GPU Real
3.9409		0.6963		0.0067
8.7272		0.5781		0.0232
16.291		0.4829		0.0283
27.6011		0.5824		0.0325
33.6842		0.2964		0.0372
38.152		0.3183		0.0448
52.8578		0.1437		0.0545
57.8123		0.0874		0.0582
FPGA Real		CPU Real		GPU Real
15.0143		3.48125		0.0192308
27.7048		2.40875		0.0576923
44.3333		1.72437		0.0615385
65.719		1.82		0.0615385
71.2905		0.823125		0.0653846
72.6714		0.795625		0.0692308
91.5286		0.325		0.0769231
95.7667		0.18125		0.0769231
